# Supplementary material
Source: publisher figshare collection journal article supplement (https://wiley.figshare.com/articles/dataset/_/3519233)
Supplement: Supplementary file 1 [file 1 › appendix-A.htm]

Ecological Archives A024-035-A1


*Ecological Archives* A024-035-A1

Jake Wall, George Wittemyer, Brian Klinkenberg, Iain Douglas-Hamilton. 2014. Novel opportunities for wildlife conservation and research with real-time monitoring. *Ecological Applications* 24:593–601. http://dx.doi.org/10.1890/13-1971.1

Appendix A. A description of the real-time monitoring system for elephant tracking, with eight sections detailing each of the system components: (1) collar description and type, (2) temporal sampling regime, (3) deployment locations, (4) data telemetry, (5) data storage, (6) data analysis, (7) alert dissemination, and (8) data access.

> View / download PDF.


---

[Back to A024-035]
